Version dated: March 29, 2019

1  
2 **Patterns and potential drivers of intraspecific variability in the**  
3 **body elemental composition of a terrestrial consumer, the**  
4 **snowshoe hare (*Lepus americanus*).**

5 Matteo Rizzuto\*, Shawn J. Leroux, Eric Vander Wal, Yolanda F. Wiersma, Travis R. Heckford,  
6 and Juliana Balluffi-Fry

7 *Department of Biology, Memorial University of Newfoundland, St. John's, Canada*

8 **\*Corresponding author.** Department of Biology, Memorial University of Newfoundland, 230  
9 Elizabeth Avenue, St. John's, Canada; Tel: +1 (709) 864-7504; email: [mrizzuto@mun.ca](mailto:mrizzuto@mun.ca)

10 **Running title:** Ontogeny and Stoichiometry of Snowshoe Hare

11 **Type of submission:** Research Article

12 **Number of words in abstract:** 348

13 **Number of words in main text:** 7309

14 **Number of references:** 53

15 **Number of tables:** 2

16 **Number of figures:** 3

## 17 Abstract

- 18 1. Intraspecific variability in ecological traits is widespread in nature. Recent evidence, mostly  
19 from aquatic ecosystems, shows individuals differing at the most fundamental level, that  
20 of their chemical composition. Age, sex, or body size may be key drivers of intraspecific  
21 variability in the body concentrations of carbon (C), nitrogen (N), and phosphorus (P).  
22 However, we still have a rudimentary understanding of the patterns and drivers of intraspecific  
23 variability in chemical composition of terrestrial consumers, particularly vertebrates.
- 24 2. Here, we investigate the whole-body chemical composition of snowshoe hare *Lepus ameri-*  
25 *canus*, providing one of the few studies of patterns of stoichiometric variability and its poten-  
26 tial drivers for a terrestrial vertebrate. Based on snowshoe hare ecology, we expected higher  
27 P and N concentrations in females, as well as in larger and older individuals.
- 28 3. We obtained whole-body C, N, and P concentrations and C:N, C:P, N:P ratios from a sample  
29 of 50 snowshoe hares. We then used general linear models to test for evidence of a relationship  
30 between age, sex, or body size and stoichiometric variability in hares.
- 31 4. We found considerable variation in the C, N, and P concentrations and elemental ratios within  
32 our sample. Contrary to our predictions, we found evidence of N content decreasing with age.  
33 As expected, we found evidence of P content increasing with body size. As well, we found no  
34 support for a relationship between sex and N or P content, nor for variability in C content  
35 and any of our predictor variables.
- 36 5. Despite finding considerable stoichiometric variability in our sample, we found no substantial  
37 support for age, sex, or body size to relate to this variation. The weak relationship between  
38 body N concentration and age may suggest varying nutritional requirements of individuals  
39 at different ages. Conversely, P's weak relationship to body size appears in line with recent  
40 evidence of the potential importance of P in terrestrial systems. Snowshoe hares are a keystone  
41 herbivore in the boreal forest of North America. The substantial stoichiometric variability we  
42 find in our sample could have important implications for nutrient dynamics in both boreal  
43 and adjacent ecosystems.

## 44 **Keywords**

45 Boreal Forest, Carbon, Ecosystem Ecology, Ecological Stoichiometry, Herbivore, Intraspecific Vari-  
46 ability, Nitrogen, Phosphorus

## 47 1 Introduction

48 The elemental composition of an organism is an important ecological trait subject to variation  
49 within and across species (Jeyasingh *et al.*, 2014; Leal *et al.*, 2017). Primary producers (e.g.,  
50 plants, algae), owing to the presence of dedicated storage structures in their cells, are plastic in  
51 their elemental composition (Sterner & Elser, 2002; Borer *et al.*, 2013), with extreme cases in which  
52 intraspecific variation exceeds that found among species (Ågren & Weih, 2012). Marine phytoplank-  
53 ton and terrestrial plants show large variability in their carbon (C), nitrogen (N), and phosphorus  
54 (P) concentrations, at both large (Martiny *et al.*, 2013; Sardans *et al.*, 2016) and small spatio-  
55 temporal extents (Rivas-Ubach *et al.*, 2012). Conversely, variability in the chemical composition of  
56 consumers is generally considered small or null, due to strict homeostasis requirements — particu-  
57 larly for terrestrial consumers (Sterner & Elser, 2002; Elser *et al.*, 2007; Leroux & Schmitz, 2015).  
58 However, evidence for strict consumer homeostasis can be equivocal and studies of invertebrates  
59 (González *et al.*, 2011) or aquatic consumers (e.g., fish; Ebel *et al.*, 2015, 2016) show considerable  
60 intraspecific stoichiometric variability. For terrestrial vertebrates, much research has focused on  
61 their nutritional body composition (Hewison *et al.*, 1996), differential use of chemical elements  
62 among conspecifics (Atwood & Weeks, 2002), or on their body condition (Peig & Green, 2010).  
63 We know little, however, about their organismal elemental composition, how it interacts with other  
64 ecological traits, and whether or not it varies among individuals. Knowledge of the patterns and  
65 drivers of terrestrial consumer body elemental composition may improve our ability to predict the  
66 relationship between terrestrial consumers and ecosystem function (e.g., carbon cycling).

67 Herbivores occupy a trophic level where they have the potential to exert top-down control on  
68 primary producers and can also affect their predators' ecology (Leroux & Schmitz, 2015). Herbi-  
69 vores rely on resources whose elemental composition is markedly different from their own: plants  
70 and algae are rich in C-heavy structural molecules, while herbivores rely on N and P to fuel their  
71 growth (Fagan *et al.*, 2002; Sterner & Elser, 2002). This mismatch, especially evident in terrestrial  
72 food webs, creates a strong bottleneck to nutrient flow in ecosystems (Boersma *et al.*, 2008; Ler-  
73 oux & Schmitz, 2015). As such, investigating the drivers of intraspecific variability in elemental  
74 composition of herbivores can help shed light on both trophic dynamics and ecosystem processes,  
75 such as nutrient cycling (Sterner & Elser, 2002; Leroux & Schmitz, 2015). Previous studies showed

76 consumers' elemental composition varying as a function of an individual's age, sex, or body size  
77 (Main *et al.*, 1997; González *et al.*, 2011; Goos *et al.*, 2017). Here, we investigate how these three  
78 variables influence the whole-body elemental content of a terrestrial consumer common across North  
79 America's boreal forest, the snowshoe hare *Lepus americanus*. We focus on C, N, and P, as these  
80 are three of the most commonly studied and important elements for an organism (Sterner & Elser,  
81 2002, but see Jeyasingh *et al.*, 2014). Owing to the strong nutrient limitation of boreal ecosystems  
82 (Pastor *et al.*, 2006), and their role as keystone herbivores in them (Krebs *et al.*, 2018), snowshoe  
83 hares are well-suited to address these questions.

84 Organismal elemental content can vary throughout an individual's life. For instance, early life  
85 stages of *Daphnia lumholtzi* show higher concentrations of P and lower N:P than older ones, that  
86 appear to more strongly influence their growth rate than their body size (Main *et al.*, 1997). Similar  
87 patterns among other phyto- and zooplankton species led to the development of the Growth Rate  
88 Hypothesis which predicts that faster growing individuals have higher body P concentrations than  
89 slower growing conspecifics, as RNA and Ribosome synthesis rely heavily on P supply (Elser *et al.*,  
90 2000; Sterner & Elser, 2002). Far from applying just to unicellular organisms, evidence shows  
91 its predictions hold true among freshwater insects as well (Back & King, 2013). Furthermore,  
92 similar intraspecific differences in elemental concentrations between life stages also exist among  
93 vertebrates (El-Sabaawi *et al.*, 2012a,b, 2014). At times, this ontogenic variation in elemental  
94 composition of conspecifics is as large as that found between different genera, as is the case among  
95 minnows (*Cyprinidae* spp.; Boros *et al.*, 2015). Consequently, this allows for describing life stage-  
96 specific elemental signatures, as recently done for pre- and post-spawn adult Atlantic salmon *Salmo*  
97 *salar* during their annual spawning migration up- and downstream, respectively (Ebel *et al.*, 2016).  
98 While mammals' life histories often do not feature dramatic events such as spawning migrations or  
99 metamorphosis, the transition from newborn to adult still involves a wide range of developmental  
100 changes, e.g., skeletal development and gonadal maturation, that could influence the elemental  
101 requirements and composition of an individual as it grows. For instance, due to its chemical  
102 composition, Sterner & Elser (2002) hypothesize that, as bone tissue should contain most of its P  
103 reserves, a vertebrate's P content should increase with age given skeletal growth.

104 In a similar way, sex could affect relative content of key elements, due to the dichotomy in  
105 reproductive strategies and roles of males and females. Yet, evidence for a relationship between

sex and stoichiometry is controversial. For example, costs of lactation or parental care (e.g., in bats; Hood *et al.*, 2006) and development of secondary sexual characteristics (e.g., antlers; Atwood & Weeks, 2002) can influence the relative concentrations of elements (Goos *et al.*, 2017). This relationship, however, is far from general. In some mayflies species, for instance, females tend to have higher %P than males and slower %P decline with age, whereas other species show no sex-related differences or even opposite trends (Back & King, 2013). Further, three-spine stickleback *Gasterosteus aculeatus* populations sampled from different lakes showed opposing trends in %P and N:P between sexes (Durstun & El-Sabaawi, 2017). Finally, among guppies (*Cyprinidae* spp.), sexual differences only appeared to exert an effect on body %P when considered together with stream of origin (El-Sabaawi *et al.*, 2012b). As these examples show, sex-related patterns of organismal stoichiometry and their relevance to a species' ecology are often difficult to ascertain. As snowshoe hares are weakly sexually dimorphic (Feldhamer *et al.*, 2003), and lack specialized secondary sexual characteristics, differences in the organismal content of C, N, or P could arise as a consequence of differences in body size or varying nutritional requirements between the sexes (e.g., due to gestation and lactation needs; Hood *et al.*, 2006).

Organismal elemental composition can also vary with an individual's body size, as well as with its related condition metrics (body condition indexes, BCI; Stevenson & Woods, 2006). In particular, P content tends to scale with an organism's size (González *et al.*, 2011; Back & King, 2013). While widespread, the sign of the relationship differs strongly among different groups, such as invertebrates and vertebrates. Invertebrates, lacking an internal repository of P, show a strongly negative pattern between P concentration and body size, in keeping with the GRH (Sterner & Elser, 2002; González *et al.*, 2011). Conversely, as among vertebrates the majority of P stocks are found in bone tissue (Sterner & Elser, 2002), the P-body size allometric relationship should be positive. That is, P concentration should increase as individuals grow larger. However, modeling approaches show that P content should initially decrease and eventually approach an asymptotic relationship with vertebrate body size (Gillooly *et al.*, 2005). Conversely, empirical evidence suggests P content increases with body size following Sterner & Elser's prediction. Among guppies, larger individuals have higher concentrations of P than their smaller conspecifics (El-Sabaawi *et al.*, 2012a). Likewise, in the Atacama Desert of Chile, two species of lizards show a similar pattern of %P increasing with body size (González *et al.*, 2011). In turn, this variability in the content of fundamental nutrients

136 with body size could influence the overall condition of an individual — which ultimately determines  
137 its fitness and nutritional value for its predators (Stevenson & Woods, 2006). In a strongly P- limited  
138 environment like the boreal forest, larger individuals could indeed show higher concentrations of P.

139 From all of the above it follows that, during an individual’s ontogenic development, its content  
140 of any given element of interest likely varies as a result of age (Ebel *et al.*, 2016), sex (Durstun &  
141 El-Sabaawi, 2017), or body size (El-Sabaawi *et al.*, 2012a). Following previous works and theory  
142 (González *et al.*, 2011; Boros *et al.*, 2015; Ebel *et al.*, 2016), we predict that (1) whole-body P  
143 content of snowshoe hares increases with increasing body size and as individuals grow older. We  
144 also expect (2) female hares to have higher content of limiting nutrients, N and P, than males,  
145 due to the higher reproductive costs. At the same time, we investigate the relationship between  
146 organismal concentration of limiting nutrients, such as N or P, and an individual’s body condition.  
147 In this case, we expect (3) snowshoe hares in better condition to have higher concentrations of  
148 N, P or both, at all life stages. We present one of the first assessments of whole-body elemental  
149 composition of a small terrestrial mammal and discuss how intraspecific stoichiometric variability  
150 might influence trophic dynamics and ecosystem processes.

## 151 **2 Methods**

### 152 **2.1 Study Species**

153 The snowshoe hare is the keystone herbivore in the boreal forests of North America, with a geo-  
154 graphic range extending from Alaska to New Mexico (Feldhamer *et al.*, 2003; Krebs *et al.*, 2018).  
155 Average total body length of snowshoe hares varies between 36–52 cm and mean adult body weight  
156 is 1.3 kg (range: 0.9–2.3 kg), with both seasonal and annual fluctuations. Females are usually  
157 10–25% larger than males (Feldhamer *et al.*, 2003).

158 Snowshoe hares are mostly nocturnal and do not hibernate over winter (Feldhamer *et al.*, 2003).  
159 For these reasons, they are most often found in habitats with dense understory vegetation, allowing  
160 for more efficient thermo-regulation and predator avoidance (Litvaitis *et al.*, 1985). Snowshoe hares  
161 populations cycle throughout the continent, with peaks every 8–11 years and densities ranging 5  
162 to 25 fold (Reynolds *et al.*, 2017; Krebs *et al.*, 2018). These abundance cycles are a defining  
163 characteristic of the boreal forest, affecting the ecology of many boreal species, from the plants the

164 snowshoe hares consume, to their competitors and predators (Krebs *et al.*, 2018).

165 Snowshoe hares were introduced in Newfoundland in 1864 and quickly spread across the island  
166 (Strong & Leroux, 2014). Studies conducted in the 1960s investigated their population dynam-  
167 ics, diet composition, and competition with another introduced herbivore, the moose *Alces alces*  
168 (Dodds, 1960, 1965). Compared to areas of Canada further west, Newfoundland has a fluctuating  
169 snowshoe hare population, with shorter and less regular periodicity (8–9 years; Reynolds *et al.*,  
170 2017). Their diet varies among seasons and areas of the island of Newfoundland (Dodds, 1960):  
171 black spruce *Picea mariana* and balsam fir *Abies balsamea* comprise most of the winter forage,  
172 whereas during the summer they feed almost exclusively on deciduous plants and shrubs (e.g.,  
173 *Vaccinium* spp.; *Trifolium* spp.; *Viburnum* spp.; Dodds, 1960).

## 174 2.2 Data Collection

### 175 2.2.1 Snowshoe hare morphology, age, and sex

176 In October 2016, we purchased 50 whole wild-caught snowshoe hares from a local trapper, and  
177 stored them in individual plastic bags at -20 °C. The specimens came from four trapping locations  
178 in the Eastern Avalon peninsula, over a small 21.5 km<sup>2</sup> trapping area around the towns of Chapel  
179 Arm (NL, 47°31'00" N, 53°40'00" W) and Long Harbour (NL, 47°25'46" N, 53°51'30" W). In the  
180 laboratory, we thawed and weighed each specimen to the closest 0.1 g. We collected data on total  
181 body length, left hind foot length, and skull length and width for each hare to the closest mm,  
182 repeating each measurement 3 times and using their arithmetic mean in all subsequent analyses  
183 (see Supplementary Information section S1.2).

184 Like rodents, the teeth of lagomorphs grow continuously during their life, making conventional  
185 aging techniques based on dentine and cement inapplicable (Morris, 1972). To account for this, we  
186 aged our specimens using a mixed approach involving counting bone tissue growth lines deposited  
187 after each winter in the mandibular bone. We used an ageing method developed for mountain hares  
188 *Lepus timidus* to select the area of the bone from which to count the growth lines (Iason, 1988).  
189 For all 50 snowshoe hares in our sample, we extracted the complete mandibular bone, cleaned it of  
190 all soft tissues, and shipped the clean bones to Matson's Laboratory (Manhattan, MT, USA) for  
191 age determination (see SI section S1.3).



192 We determined specimen sex using a DNA-based approach (Shaw *et al.*, 2003; see SI sec-  
193 tion S1.4). As the snowshoe hare genome is not yet completely sequenced, we used published  
194 primers for the European rabbit *Oryctolagus cuniculus* to amplify the genetic material extracted  
195 from our specimens and from two control snowshoe hares of known sex (Fontanesi *et al.*, 2008). In  
196 cases when this DNA-based approach failed to detect an individual's sex ( $n=3$ ), we determined it  
197 by visual inspection and palpation of the genital area.

### 198 **2.2.2 Body Size Metrics**

199 To investigate the relationship between body size and organismal chemical composition of snowshoe  
200 hares we used two different metrics: body condition and average body length. Body condition is  
201 a widely used metric to assess the overall health and quality of an animal (Stevenson & Woods,  
202 2006; Peig & Green, 2010). To estimate body condition we used the scaled mass index (SMI; Peig  
203 & Green, 2009, 2010). The SMI standardizes an individual's measure of body size with respect to  
204 another, thus accounting for scaling relationships (Peig & Green, 2009). In particular, the SMI uses  
205 the average value of the length measurement ( $L$ ) with the strongest relationship with body size  
206 (i.e., its body weight,  $M$ ) as the standardizing variable, as established by a Standardized Major  
207 Axis regression (Peig & Green, 2009; see SI section S1.5). The SMI formula is:

$$\hat{M}_i = M_i \left[ \frac{L_0}{L_i} \right]^{b_{SMA}} \quad (1)$$

208 where  $\hat{M}_i$  is the SMI of individual  $i$ ,  $M_i$  is its body weight,  $L_i$  is the linear measure of body size of  
209  $i$ ,  $b_{SMA}$  is the exponent (i.e., slope) of a Standardized Major Axis Regression of  $\ln(M)$  over  $\ln(L)$ ,  
210 and  $L_0$  is the study population's average value of  $L_i$ . Therefore, the SMI is the expected weight of  
211 the individual if its length measurement was equal to the population's average value. In this way,  
212 the SMI provides an easily understandable assessment of an animal's condition. In this study, we  
213 used the length of the left hind foot to calculate the SMI. From the SMI value, we then computed  
214 the relative body condition ( $K_n$ ) of an individual as the ratio of  $M_i$  to  $\hat{M}_i$  (Stevenson & Woods,  
215 2006). This provided us with a simple metric to assess how good or bad an individual's condition  
216 was, compared to what it should be.

217 As the SMI is sensitive to the length measurement used to calculate it, we ran a separate set of

218 models using a SMI produced using skull length, which also showed a strong relationship with body  
219 weight (see SI section S1.5). Furthermore, we considered average body length as a separate estimate  
220 of the effect of body size on the C:N:P stoichiometry of snowshoe hares. We calculated average body  
221 length of individual snowshoe hares by taking the arithmetic mean of the three measurements of  
222 total body length we collected from each specimen, and used this value in all subsequent analyses.

### 223 **2.2.3 Whole-body Stoichiometry**

224 After collecting both morphological data and bone samples required for ageing, we reduced the  
225 whole hare to a homogeneous paste using a Retsch GM300 knife mill (Retsch GmbH, Haan, Ger-  
226 many). Through preliminary tests conducted on road-killed individuals not included in our sample  
227 of 50, we noticed that elastic or fine tissues, such as skin, fur, ears, and the walls of the digestive  
228 tract, were particularly difficult to homogenize with our equipment. Consequently, we removed  
229 fur, skin, and ears from all specimens. For the digestive tract, instead, we removed, cleaned, and  
230 finely chopped it before adding it back into the mixture. For each specimen, we collected a sample  
231 of the homogenized mixture, weighed it for wet weight (g), and oven dried it for an average of 4  
232 nights at 50 °C. After drying, we further ground each sample to as fine a powder as possible using  
233 mortar and pestle, and weighed it again for dry weight (g). On average, we required 50 g of wet  
234 homogenized material to produce 10 g of dry material for elemental composition determination.  
235 We transferred all ground samples to glass vials and stored them in desiccators to prevent moisture  
236 accumulation and mold formation.

237 We sent the 50 dried, whole-body samples to the Agriculture and Food Laboratory (AFL) at  
238 the University of Guelph for determination of the whole-body content of C, N, and P as % of  
239 each sample's dry weight. At AFL, each sample was further ground before stoichiometric analyses.  
240 Concentrations of C and N were obtained by ashing the samples at 475 °C for 3 hours prior to carbon  
241 analysis using catalytic combustion (950 °C) with an Elementar vario MACRO cube (Elementar  
242 Analysensysteme GmbH, Langensfeld, Germany). This separates the desired elements from  
243 foreign gases: the elements are then analyzed using thermal conductivity detection. Organic C  
244 quantity was calculated via subtraction of inorganic C from total C obtained in this way. For P,  
245 homogenized samples were first digested with nitric acid and hydrochloric acid using a closed-vessel  
246 microwave (CEM Marsxpress, CEM Corporation, Matthews, NC, USA). The microwave-digested

247 sample was then brought to volume with nanopure water and P content quantified using Inductively-  
248 coupled Plasma-Optical Emission Spectroscopy using a Varian Vista Pro ICP-OES and a pneumatic  
249 nebulizer (Varian Inc., Palo Alto, CA, USA) (Poitevin, 2012).

250 Given that few studies have homogenized and measured the elemental composition of terrestrial  
251 vertebrates, we ran pilot tests to assess within-sample variability. These showed some within-sample  
252 variability in %C and %N. To account for this, each sample was analyzed three times for C and N  
253 content. Conversely, %P was relatively invariant within samples. Because of this, only 5 samples  
254 were run in duplicate to assess within-sample variability in %P (see SI section S1.6). In addition,  
255 to capture variability within individuals due to our homogenization protocol, we selected 5 random  
256 specimens for which we sent 2 additional samples (n=10) of the homogenized paste to AFL (see SI  
257 section S1.6). Upon receiving the results back from AFL, to obtain C:N:P stoichiometry and molar  
258 ratios for each hare, we calculated each hare's dry body weight and converted the concentration of  
259 each element to molar mass using atomic weights. As variation among samples taken from each  
260 individual was negligible for all three elements, we used average values of %C, %N and %P for each  
261 individual in subsequent analyses (see SI section S1.7).

### 262 **2.3 Statistical Analyses**

263 We used General Linear Models (GLMs) in R (v. 3.4.4; R Core Team, 2018) to investigate age, sex,  
264 and body size as potential drivers of whole-body hare stoichiometry. We used the concentration  
265 of each element of interest (i.e., %C, %N, %P), as well as the ratios C:N, C:P, and N:P as our  
266 response variables. Age (continuous), sex (categorical), relative body condition ( $K_n$ , continuous),  
267 and average body length (ABL, continuous) were our explanatory variables. To test our predictions,  
268 we considered the effects of each of our predictor variables alone and their additive and 2-way  
269 interactive effects. We tested for multicollinearity among our explanatory variables using variance  
270 inflation factor analysis (VIF). As expected, VIF showed that relative body condition and average  
271 body length were highly correlated (VIF>3). Therefore we did not include these two variables in  
272 the same model (see SI section S2). We fit a set of 22 competing models, including an intercept-only  
273 model, and used the function AICc from the AICmodavg R package to select the most parsimonious  
274 model based on the Akaike Information Criterion corrected for small sample size (AICc; Burnham &  
275 Anderson, 2002; Mazerolle, 2017). We then removed models with uninformative parameters (*sensu*

276 Arnold, 2010) from the model set of each response variable (Leroux, 2019; see SI section S3.1).

### 277 3 Results

278 Snowshoe hares in our sample varied in age between 0 (“young-of-the-year”) and 6 years old, the  
279 majority (74%) being between 0 and 1 years old. Only one individual, a female, was 6 years old.  
280 Males were more common (31 out of 50) than females (19). Average ( $\pm$ SD) wet body weight was  
281 1374.81 g ( $\pm$ 186.59, range: 914.30–1776.50 g), with average dry weight being 399.11 g ( $\pm$ 74.70,  
282 range: 241.76–567.86 g). Water made up to 72% of body weight. Average body length was  
283 42.49 cm ( $\pm$ 2.07, range: 36.67–46.67 cm). Average left hind foot length ( $L_0$ ) for our snowshoe  
284 hare population was 12.88 cm ( $\pm$ 0.58, range: 11.40–14.10 cm). The slope of the Standardized  
285 Major Axis Regression of average left hind foot length on body mass (i.e., the exponent  $b_{SMA}$  in  
286 Equation (1)) was 3.18. Overall, young snowshoe hares appeared more variable in relative body  
287 condition than older individuals (mean:  $1.01 \pm 0.14$ ; Fig. S5).

288 Snowshoe hares were, on average, composed of 43.60% C ( $\pm$ 2.59, range: 37.46%–51.29%),  
289 11.20% N ( $\pm$ 0.78, range: 9.42%–12.68%), and 2.97% P ( $\pm$ 0.52, range: 2.00%–4.29%; Fig. 1). The  
290 most parsimonious model for %N included only age ( $R^2=0.066$ ): %N was negatively related to the  
291 age of individual snowshoe hares (Table 1). Evidence for this relationship is, however, weak as the  
292 intercept-only model was within 2  $\Delta$ AICc of the top ranked model (Table 1). For %P, the two top  
293 ranked models included relative body condition and average body length, respectively (Table 1).  
294 %P was positively related to relative body condition ( $R^2=0.073$ ; Fig. 2) and average body length  
295 ( $R^2=0.047$ ). Again, evidence for these relationships is weak as the intercept-only model was the  
296 third-best performing model and within 2  $\Delta$ AICc of the top ranked models (Table 1). We also  
297 observed a qualitative pattern of higher %P among older males (Fig. 3), but found no statistical  
298 support for it (Table 1). For %C, the top ranked model was the intercept-only model, which  
299 provides no evidence of a relationship between variation in %C and age, sex, or body size of  
300 individuals (Table 1).

301 For the stoichiometric ratios, the top ranked model for C:N included only age, which had a  
302 positive relationship with C:N ratio ( $R^2=0.074$ ; Table 2). For this relationship too, evidence is  
303 weak as the intercept-only model was within 2  $\Delta$ AICc of the best-performing one. We found no

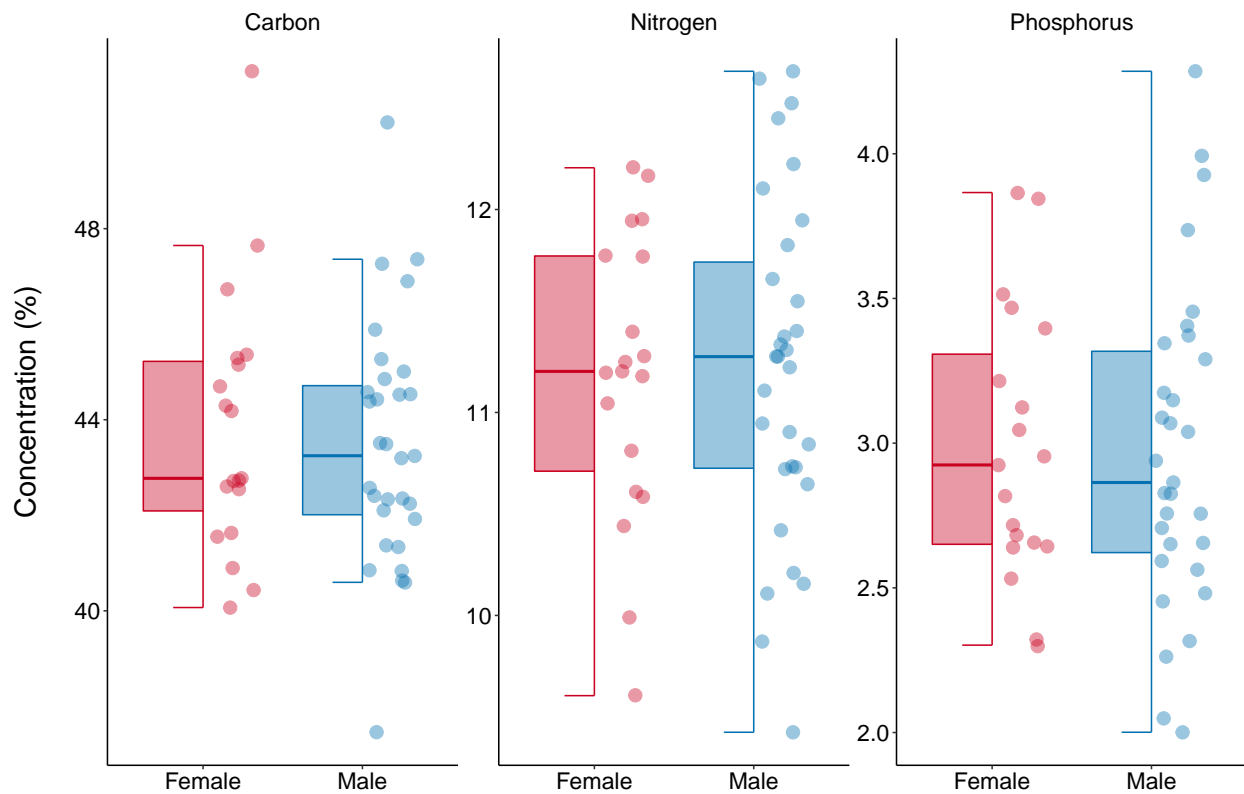

**Figure 1:** Sex-related variability in the concentrations of carbon (C), nitrogen (N), and phosphorus (P) among 50 snowshoe hares. The lower and upper boundaries of the box are the first and third quartiles, respectively. The thick horizontal line inside the box is the median, i.e., the second quartile. The whiskers extend from either boundary to no further than the largest (or smallest) value \* 1.5 IQR (interquartile range). Female snowshoe hares show higher median values of %P than males. Males, on the other hand, appear consistently more variable than females in their content of both N and P. Note the different scales of the y-axis among the three panels.

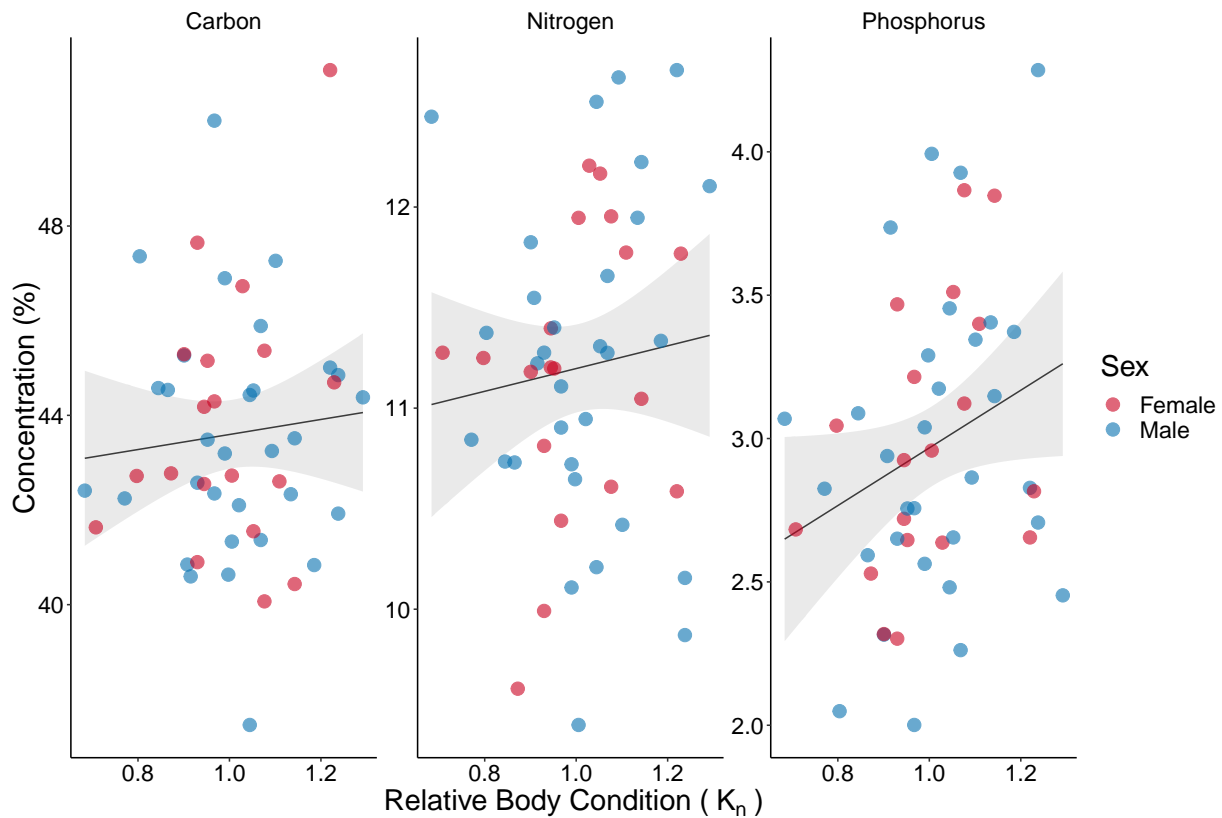

**Figure 2:** Variability in the concentrations of C, N, and P with increasing relative body condition. The positive trend for P is evident, and is weakly supported by the results of our modeling. Conversely, there is no visual evidence of a relationship between %C or %N and relative body condition, which is further confirmed by the results of our modeling (Table 1). Solid lines are ordinary least square regression lines, shaded areas represent 95% confidence intervals around them.

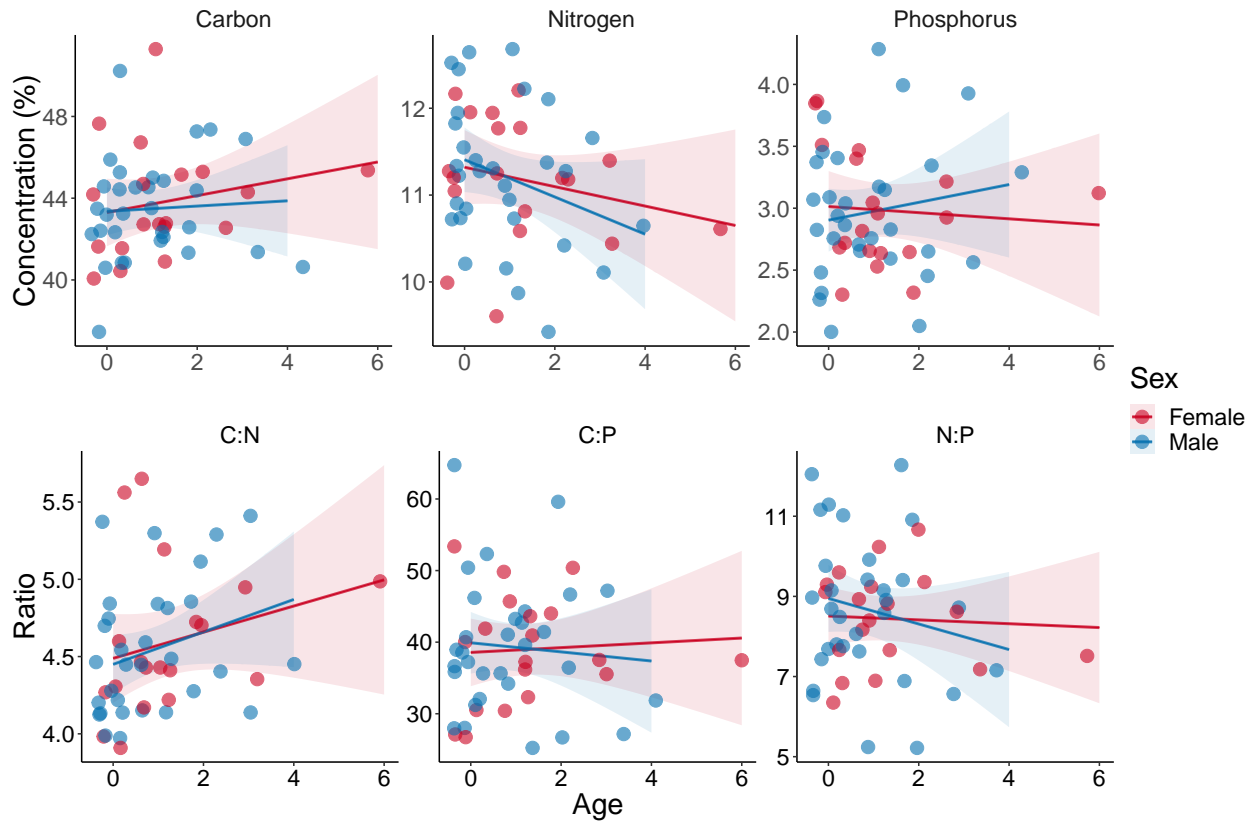

**Figure 3:** Variability in C, N, P concentrations and their stoichiometric ratios with increasing age among 50 snowshoe hares. **Upper panels:** while concentrations of P appear largely invariant as age increases, we notice a negative trend for N concentration for both sexes. This is further supported by the weak relationship found between age and %N through our modeling approach. Conversely, our modeling does not provide any support for the seemingly increasing trend we observe for %C. **Lower panels:** values of C:N appear to increase with age, for both males and females, as would be expected given the negative relationship between %N and age. Conversely, the values of N:P seem to decrease as males get older, which might mean that %N is more strongly influencing the variability of this ratio than %P is. No trend appears evident for C:P, which is in line with the lack of pattern in the variability of %C. We added a jitter to the data to improve readability of the graphs. All other specifications as in Fig. 2.

304 evidence for a relationship between age, sex, body size, and either C:P or N:P as the top ranked  
 305 model for both these ratios was the intercept-only model (Table 2). Using skull length instead  
 306 of left hind foot length to calculate  $K_n$  did not qualitatively change our results (see SI Tables S1  
 307 and S2).

**Table 1:** Top ranking GLMs for %C, %N, and %P based on  $\Delta\text{AICc}$  values. We report only models that scored better than the null model, together with the null model. k, number of parameters in the model, LL, log-likelihood,  $K_n$ , relative body condition, ABL, average body length. We provide coefficient values as estimate ( $\pm\text{SE}$ ).

| %N top models |          |                     |       | Coefficients              |                           |                          |                          |
|---------------|----------|---------------------|-------|---------------------------|---------------------------|--------------------------|--------------------------|
| k             | LL       | $\Delta\text{AICc}$ | $R^2$ | Intercept                 | Age                       | $K_n$                    | ABL                      |
| 3             | -56.599  | 0.000               | 0.066 | 11.367<br>( $\pm 0.141$ ) | -0.160<br>( $\pm 0.087$ ) |                          |                          |
| 2             | -58.306  | 1.147               | 0.000 | 11.200<br>( $\pm 0.111$ ) |                           |                          |                          |
| %P top models |          |                     |       | Coefficients              |                           |                          |                          |
| k             | LL       | $\Delta\text{AICc}$ | $R^2$ | Intercept                 | Age                       | $K_n$                    | ABL                      |
| 3             | -35.556  | 0.000               | 0.073 | 1.962<br>( $\pm 0.526$ )  |                           | 1.006<br>( $\pm 0.518$ ) |                          |
| 3             | -36.252  | 1.391               | 0.047 | 0.687<br>( $\pm 1.495$ )  |                           |                          | 0.054<br>( $\pm 0.035$ ) |
| 2             | -37.444  | 1.508               | 0.000 | 2.974<br>( $\pm 0.073$ )  |                           |                          |                          |
| %C top models |          |                     |       | Coefficients              |                           |                          |                          |
| k             | LL       | $\Delta\text{AICc}$ | $R^2$ | Intercept                 | Age                       | $K_n$                    | ABL                      |
| 2             | -118.090 | 0.000               | 0.000 | 43.606<br>( $\pm 0.367$ ) |                           |                          |                          |

## 308 4 Discussion

309 We provide one of few assessments of the body elemental composition of a terrestrial vertebrate  
 310 and investigate potential drivers of this fundamental ecological trait. Overall, we find considerable  
 311 variation in the concentrations of C, N, P, and their ratios within our sample of snowshoe hares.  
 312 However, age, sex, and body size appear to explain little of this variation. Our models highlight  
 313 a weak and negative relationship between an individual's age and its N concentration, and a sym-



**Table 2:** Top ranking GLMs for C:N, C:P, and N:P based on  $\Delta\text{AICc}$  values. All specifications as in Table 1.

| <b>C:N top models</b> |         |                     |       | <b>Coefficients</b>       |                          |       |     |
|-----------------------|---------|---------------------|-------|---------------------------|--------------------------|-------|-----|
| k                     | LL      | $\Delta\text{AICc}$ | $R^2$ | Intercept                 | Age                      | $K_n$ | ABL |
| 3                     | -27.818 | 0.000               | 0.074 | 4.465<br>( $\pm 0.079$ )  | 0.095<br>( $\pm 0.049$ ) |       |     |
| 2                     | -29.731 | 1.559               | 0.000 | 4.564<br>( $\pm 0.063$ )  |                          |       |     |
| <b>C:P top models</b> |         |                     |       | <b>Coefficients</b>       |                          |       |     |
| k                     | LL      | $\Delta\text{AICc}$ | $R^2$ | Intercept                 | Age                      | $K_n$ | ABL |
| 2                     | -178.30 | 0.000               | 0.000 | 39.205<br>( $\pm 1.223$ ) |                          |       |     |
| <b>N:P top models</b> |         |                     |       | <b>Coefficients</b>       |                          |       |     |
| k                     | LL      | $\Delta\text{AICc}$ | $R^2$ | Intercept                 | Age                      | $K_n$ | ABL |
| 2                     | -94.153 | 0.000               | 0.000 | 8.580<br>( $\pm 0.227$ )  |                          |       |     |

314 metrically weak and positive trend between age and C:N. Likewise, we find weak support for a  
 315 relationship between an individual's body size and its P content. Together, these results provide  
 316 some of the first evidence for intraspecific variability in the stoichiometry of a terrestrial vertebrate  
 317 but raise the need to consider a broader suite of potential drivers of the variability we observed.

318 Based on our analyses, we found weak evidence in support of our prediction that age might  
 319 drive variability in body elemental composition of snowshoe hares. In particular, we observe a  
 320 negative trend in N concentration: young individuals (0–1 years old) have seemingly higher N  
 321 concentrations than older ones — with a more pronounced decrease among males than among  
 322 females (Fig. 3). As would be expected from this pattern, C:N values show an opposite, positive  
 323 trend with age (Fig. 3) — reflecting the lower amounts of N compared to C in older hares and  
 324 lending further support to this result. Age is a fundamental driver of stoichiometric differences  
 325 among conspecifics, as shown for a range of different species (Boros *et al.*, 2015; Ebel *et al.*, 2015).  
 326 Younger individuals may show higher %N as a result of increased N allocation to muscle tissue  
 327 production (Boros *et al.*, 2015). Snowshoe hares experience strong predation pressure from a large  
 328 cohort of predators from the earliest life stages (Krebs *et al.*, 2018). The higher N content among  
 329 leverets we observe, then, could be a sign of early investments in production of N-rich protein to

330 develop the muscle mass necessary for their hide and run anti-predator response. We also observed  
331 a qualitative pattern of increasing %P with age among males. While we lack quantitative support  
332 for this trend (Table 1), it is nonetheless in line with current theories. Indeed, Sterner & Elser  
333 (2002) postulate that the Growth Rate Hypothesis prediction of higher P concentrations among  
334 young, fast-growing individuals might not hold or apply differently in vertebrates, where the vast  
335 majority of P is locked in the skeleton (Sterner & Elser, 2002). Our observation of higher %P  
336 in older male hares falls in line with other recent evidence supporting Sterner & Elser's insight:  
337 Boros *et al.* (2015), for instance, did not find an ontogenic trend in P concentration of two species  
338 of laboratory-reared minnows. Future research should assess the GRH applicability beyond the  
339 unicellular and aquatic systems in which it was originally conceived.

340 Counter to our prediction, we find no evidence for a relationship between hare stoichiometry  
341 and sex. Male individuals did show larger variability in their N concentration than females (Figs 1–  
342 3), but our models provide no quantitative support for this observation. This lack of evidence for  
343 differences between sexes may not be surprising. Several studies that investigated the relation-  
344 ship between sex and organismal stoichiometry provide contradictory evidence (El-Sabaawi *et al.*,  
345 2012b; Back & King, 2013; Goos *et al.*, 2017). Among guppies, for instance, sex had no relationship  
346 with stoichiometry when considered alone, yet it had significant interactions with the fish's stream  
347 of origin — likely an indirect consequence of different predation levels experienced by males and  
348 females in different streams (El-Sabaawi *et al.*, 2012b). Conversely, a recent study on *Hyalella* am-  
349 phipods found evidence of strong sexual dimorphism in the concentrations and patterns of variation  
350 of multiple elements, which underlay sexual dimorphism in traits as different as foraging behaviour,  
351 nutritional physiology, and sex-specific selection of genomic loci (Goos *et al.*, 2017). Additionally,  
352 among antler-producing ungulates, males and females differ in both content and use of certain  
353 elements (e.g., calcium; Atwood & Weeks, 2002). Finally, as hares undergo morpho-physiological  
354 changes during their reproductive season, investigating the relationship between whole-body stoi-  
355 chiometry and sex among actively reproducing hares might produce different results (Hood *et al.*,  
356 2006). These contrasting lines of evidence highlight the need of further research, involving a wider  
357 range of species from a variety of environments, to reduce the uncertainty around the role of sex  
358 as a driver of variation in organismal stoichiometry.

359 Consistent with our predictions, our results indicate body size as a potential driver for variability

360 in P concentration in our sample. The two top models for this element included relative body  
361 condition and average body length, and both variables had a positive relationship with %P. In  
362 particular, the observed body weight of snowshoe hares with higher %P matched or exceeded the  
363 predicted value obtained from the SMI formula (Equation (1)). Snowshoe hare body condition  
364 fluctuates throughout the year (Murray, 2002), with peaks in the months leading up to the boreal  
365 winter, during which hares remain active and face increased levels of stress due to both lack of  
366 optimal forage and increased predation (Krebs *et al.*, 2018). As body condition declines over the  
367 winter months (Murray, 2002), it would be interesting to test whether the weak relationship we  
368 observe between P and body condition would vary in a similar way. Additionally, we observe a  
369 qualitatively larger variability in relative body condition among young hares in our sample than  
370 among older specimens (Fig. S5). Snowshoe hares produce many litters in a year (up to four;  
371 Feldhamer *et al.*, 2003), yet a large number of leverets do not survive their first winter (Krebs  
372 *et al.*, 2018). While we do not find evidence for a relationship between age and P content, it would  
373 nonetheless be interesting to test whether being born early or late in the year could explain part of  
374 this variability. Our results, albeit weakly supported by our statistical analyses, appear to confirm  
375 the potential role P plays within the internal chemical machinery of an animal, and its importance  
376 for its survival (Elser *et al.*, 2007; Boersma *et al.*, 2008).

377 A large amount of variability in our sample remains unexplained and, overall, we find only weak  
378 support for our initial hypothesis of ontogenic variation in organismal elemental composition among  
379 snowshoe hares. Indeed, other vertebrate species show much stronger patterns of intraspecific  
380 variation in elemental content. Ebel *et al.* (2015, 2016), for instance, showed that Atlantic salmon  
381 *S. salar* at different ontogenic stages have distinct stoichiometric signatures, particularly before and  
382 after their first migration from their freshwater nurseries to the open ocean. The reason for these  
383 differences in the magnitude of the effects mediated by ontogeny could be found in the life history  
384 of snowshoe hares. Snowshoe hares do not undergo dramatic life events like the salmon's migration,  
385 or the metamorphosis of certain insect species, which clearly separate different life stages. Rather,  
386 they are characterized by short gestation periods ( $\approx 30$ -40 days; Feldhamer *et al.*, 2003) and quick  
387 maturation of leverets into adults ( $\approx 6$  months). It is possible, in this scenario, that we investigated  
388 the effects of age at a time in the life of snowshoe hares when most of the changes in chemical  
389 composition had already taken place. It is also interesting to note the larger proportion of young

390 individuals in our sample, consistent with current knowledge about snowshoe hare survival beyond  
391 their first winter (Krebs *et al.*, 2018). Thus, a potentially interesting and rewarding research  
392 avenue would be to further investigate differences in hare whole-body stoichiometry during the  
393 earlier stages of their lives. Finally, although our samples were collected from a small area, fine  
394 scale forage quality may also be a driver of the stoichiometric variability we observed. Future  
395 work could investigate spatial variation in habitat and forage quality as a driver of consumer body  
396 elemental composition (Leroux *et al.*, 2017).

397 The variation in hare body composition we observe could have repercussions beyond the sto-  
398 ichiometry of this species, and influence ecosystem processes such as nutrient cycling, transport,  
399 and primary productivity (Pastor *et al.*, 2006). Snowshoe hares are the keystone herbivore in the  
400 boreal forest, a markedly nutrient-limited environment (Pastor *et al.*, 2006). They are character-  
401 ized by strong, decade-long fluctuations in their population abundance and serve as primary food  
402 source for many predator species (Krebs *et al.*, 2018). Paucity of nutrients, and the well-known  
403 stoichiometric mismatch between plants and herbivores (Elser *et al.*, 2000; Sterner & Elser, 2002),  
404 prompted boreal forest herbivores to evolve browsing strategies allowing them to extract as much  
405 nutrients as possible from their food sources (Pastor *et al.*, 2006). Thus, the appearance of a  
406 large number of young snowshoe hares over the landscape during a population peak could have  
407 strong dampening effects on elemental cycling in the boreal forest — as well as in adjacent ecosys-  
408 tems — possibly reducing N or P availability to primary producers as they become locked within  
409 the herbivores' biomass. By infusing ongoing ecological research with stoichiometric data, future  
410 studies could address this potential interplay between a species' stoichiometry and the ecosystem  
411 processes it contributes to (Leal *et al.*, 2017). In turn, this would allow for shedding light on fine-  
412 grain mechanisms with far-reaching consequences, such as cross-ecosystem nutrient mobilization  
413 (Schmitz *et al.*, 2018) and nutrient recycling (Schmitz *et al.*, 2014), as well as on their influence on  
414 ecosystem services fundamental for humans.

415 Ecological stoichiometry has a long history in marine and freshwater ecosystems and has been  
416 shaped by detailed studies of algae, plants and invertebrates (Elser *et al.*, 2007; González *et al.*,  
417 2011; Ågren & Weih, 2012). In recent years, researchers started investigating the stoichiometry  
418 of more complex organisms in aquatic ecosystems, particularly fish (El-Sabaawi *et al.*, 2012a,b,  
419 2014). This expanded the reach of ecological stoichiometry in exciting new directions, integrating

420 it with other subfields of ecology, such as metabolic ecology (Rivas-Ubach *et al.*, 2012), ecosystem  
421 ecology (Abbas *et al.*, 2012), and landscape ecology (Sardans *et al.*, 2016; Leroux *et al.*, 2017). Yet,  
422 terrestrial species other than plants remain largely unexplored in terms of their stoichiometry. Our  
423 results suggest that a greater focus on terrestrial vertebrates and consumers could provide novel  
424 insights and potentially question well-known concepts in this field.

## 425 **5 Statement of Authorship**

- 426 • MR, SJL, EVW, and YFW devised the study;
- 427 • MR, TRH, JBF, SJL, YFW, and EVW collected the data;
- 428 • MR analyzed the data;
- 429 • MR, TRH, JBF, SJL, YFW, and EVW interpreted the data;
- 430 • MR led the writing of the manuscript.

431 All authors contributed critically to the drafts and gave final approval for publication.

## 432 **6 Acknowledgements**

433 The authors would like to thank Ms. Isabella Richmond for thoughtful comments on earlier drafts of  
434 the manuscript. MR would like to acknowledge the help of Mr. Shawn Reid, Ms. Meriel Fitzgerald,  
435 Mr. Benjamin Stratton, and Ms. Nathalie Djan-Chékar during data collection. MR would also like  
436 to thank Prof. Edward “Ted” Miller for pointing out the method used to age snowshoe hare. This  
437 research was funded by the Government of Newfoundland and Labrador, Innovate NL, Mitacs, the  
438 Canada Foundation for Innovation, Memorial University, and a Natural Science and Engineering  
439 Research Council Discovery Grant to SJL. This research was approved by the Memorial University  
440 Animal Care Committee, permit number 18-02-EV.

## 441 **7 Data Availability**

442 Data and code used in the analyses are available via the figshare online repository at:

443 <https://doi.org/10.6084/m9.figshare.7884854.v1>

## 444 References

- 445 Abbas, F., Merlet, J., Morellet, N., Verheyden, H., Hewison, A.J.M., Cargnelutti, B., Angibault,  
446 J.M., Picot, D., Rames, J.L., Lourtet, B., Aulagnier, S. & Daufresne, T. (2012) Roe deer may  
447 markedly alter forest nitrogen and phosphorus budgets across Europe. *Oikos* **121**, 1271–1278,  
448 doi: [10.1111/j.1600-0706.2011.20103.x](https://doi.org/10.1111/j.1600-0706.2011.20103.x).
- 449 Ågren, G.I. & Weih, M. (2012) Plant stoichiometry at different scales: element concentration  
450 patterns reflect environment more than genotype. *New Phytol.* **194**, 944–952, doi: [10.1111/j.1469-8137.2012.04114.x](https://doi.org/10.1111/j.1469-8137.2012.04114.x).
- 452 Arnold, T.W. (2010) Uninformative Parameters and Model Selection Using Akaike’s Information  
453 Criterion. *J. Wildl. Manage.* **74**, 1175–1178, doi: [10.2193/2009-367](https://doi.org/10.2193/2009-367).
- 454 Atwood, T.C. & Weeks, H.P. (2002) Sex- and Age-specific Patterns of Mineral Lick Use by  
455 White-tailed Deer (*Odocoileus virginianus*). *Am. Midl. Nat.* **148**, 289, doi: [10.1674/0003-0031\(2002\)148%5B0289:SAASPO%5D2.0.CO;2](https://doi.org/10.1674/0003-0031(2002)148%5B0289:SAASPO%5D2.0.CO;2).
- 457 Back, J.A. & King, R.S. (2013) Sex and size matter: ontogenetic patterns of nutrient content of  
458 aquatic insects. *Freshw. Sci.* **32**, 837–848, doi: [10.1899/12-181.1](https://doi.org/10.1899/12-181.1).
- 459 Boersma, M., Aberle, N., Hantzsche, F.M., Schoo, K.L., Wiltshire, K.H. & Malzahn, A.M.  
460 (2008) Nutritional limitation travels up the food chain. *Int. Rev. Hydrobiol.* **93**, 479–488, doi:  
461 [10.1002/iroh.200811066](https://doi.org/10.1002/iroh.200811066).
- 462 Borer, E.T., Bracken, M.E.S., Seabloom, E.W., Smith, J.E., Cebrian, J., Cleland, E.E., Elser, J.J.,  
463 Fagan, W.F., Gruner, D.S., Harpole, W.S., Hillebrand, H., Kerkhoff, A.J. & Ngai, J.T. (2013)  
464 Global biogeography of autotroph chemistry: is insolation a driving force? *Oikos* **122**, 1121–1130,  
465 doi: [10.1111/j.1600-0706.2013.00465.x](https://doi.org/10.1111/j.1600-0706.2013.00465.x).
- 466 Boros, G., Sály, P. & Vanni, M.J. (2015) Ontogenetic variation in the body stoichiometry of two  
467 fish species. *Oecologia* **179**, 329–341, doi: [10.1007/s00442-015-3349-8](https://doi.org/10.1007/s00442-015-3349-8).
- 468 Burnham, K. & Anderson, D. (2002) *Model Selection and Multimodel Inference: A Practical*  
469 *Information-Theoretic Approach*. Springer-Verlag New York, 2 edn., doi: [10.1007/b97636](https://doi.org/10.1007/b97636).

- 470 Dodds, D.G. (1960) Food Competition and Range Relationships of Moose and Snowshoe hare in  
471 Newfoundland. *J. Wildl. Manage.* **24**, 52–60, doi: [10.2307/3797356](https://doi.org/10.2307/3797356).
- 472 Dodds, D.G. (1965) Reproduction and Productivity of Snowshoe Hares in Newfoundland. *J. Wildl.*  
473 *Manage.* **29**, 303–315, doi: [10.2307/3798435](https://doi.org/10.2307/3798435).
- 474 Durston, D.J. & El-Sabaawi, R.W. (2017) Bony traits and genetics drive intraspecific variation in  
475 vertebrate elemental composition. *Funct. Ecol.* **31**, 2128–2137, doi: [10.1111/1365-2435.12919](https://doi.org/10.1111/1365-2435.12919).
- 476 Ebel, J.D., Leroux, S.J., Robertson, M.J. & Dempson, J.B. (2015) Ontogenetic differences in At-  
477 lantic salmon phosphorus concentration and its implications for cross ecosystem fluxes. *Ecosphere*  
478 **6**, 1–18, doi: [10.1890/ES14-00516.1](https://doi.org/10.1890/ES14-00516.1).
- 479 Ebel, J.D., Leroux, S.J., Robertson, M.J. & Dempson, J.B. (2016) Whole body-element composition  
480 of Atlantic salmon *Salmo salar* influenced by migration direction and life stage in three distinct  
481 populations. *J. Fish Biol.* **89**, 1–10, doi: [10.1111/jfb.13123](https://doi.org/10.1111/jfb.13123).
- 482 El-Sabaawi, R.W., Kohler, T.J., Zandonà, E., Travis, J., Marshall, M.C., Thomas, S.A., Reznick,  
483 D.N., Walsh, M., Gilliam, J.F., Pringle, C. & Flecker, A.S. (2012a) Environmental and organismal  
484 predictors of intraspecific variation in the stoichiometry of a neotropical freshwater fish. *PLoS*  
485 *One* **7**, e32713, doi: [10.1371/journal.pone.0032713](https://doi.org/10.1371/journal.pone.0032713).
- 486 El-Sabaawi, R.W., Travis, J., Zandonà, E., McIntyre, P.B., Reznick, D.N. & Flecker, A. (2014)  
487 Intraspecific variability modulates interspecific variability in animal organismal stoichiometry.  
488 *Ecol. Evol.* **4**, 1505–1515, doi: [10.1002/ece3.981](https://doi.org/10.1002/ece3.981).
- 489 El-Sabaawi, R.W., Zandonà, E., Kohler, T.J., Marshall, M.C., Moslemi, J.M., Travis, J., Lopez-  
490 Sepulcre, A., Ferriere, R., Pringle, C.M., Thomas, S.A., Reznick, D.N. & Flecker, A.S. (2012b)  
491 Widespread intraspecific organismal stoichiometry among populations of the Trinidadian guppy.  
492 *Funct. Ecol.* **26**, 666–676, doi: [10.1111/j.1365-2435.2012.01974.x](https://doi.org/10.1111/j.1365-2435.2012.01974.x).
- 493 Elser, J.J., Bracken, M.E.S., Cleland, E.E., Gruner, D.S., Harpole, W.S., Hillebrand, H., Ngai, J.T.,  
494 Seabloom, E.W., Shurin, J.B. & Smith, J.E. (2007) Global analysis of nitrogen and phosphorus  
495 limitation of primary producers in freshwater, marine and terrestrial ecosystems. *Ecol. Lett.* **10**,  
496 1135–1142, doi: [10.1111/j.1461-0248.2007.01113.x](https://doi.org/10.1111/j.1461-0248.2007.01113.x).



- 497 Elser, J.J., O'Brien, W.J., Dobberfuhl, D.R. & Dowling, T.E. (2000) The evolution of ecosystem  
498 processes: growth rate and elemental stoichiometry of a key herbivore in temperate and arctic  
499 habitats. *J. Evol. Biol.* **13**, 845–853, doi: [10.1046/j.1420-9101.2000.00215.x](https://doi.org/10.1046/j.1420-9101.2000.00215.x).
- 500 Fagan, W.F., Siemann, E., Mitter, C., Denno, R.F., Huberty, A.F., Woods, H.A. & Elser, J.J.  
501 (2002) Nitrogen in insects: Implications for trophic complexity and species diversification. *Am.*  
502 *Nat.* **160**, 784–802, doi: [10.1086/343879](https://doi.org/10.1086/343879).
- 503 Feldhamer, G.A., Thompson, B.C. & Chapman, J.A. (2003) *Wild mammals of North America:*  
504 *biology, management, and conservation*. JHU Press.
- 505 Fontanesi, L., Tazzoli, M., Pecchioli, E., Hauffe, H.C., Robinson, T.J. & Russo, V. (2008) Sex-  
506 ing European rabbits (*Oryctolagus cuniculus*), European brown hares (*Lepus europaeus*) and  
507 mountain hares (*Lepus timidus*) with ZFX and ZFY loci. *Mol. Ecol. Resour.* **8**, 1294–1296, doi:  
508 [10.1111/j.1755-0998.2008.02167.x](https://doi.org/10.1111/j.1755-0998.2008.02167.x).
- 509 Gillooly, J.F., Allen, A.P., Brown, J.H., Elser, J.J., del Rio, C.M., Savage, V.M., West, G.B.,  
510 Woodruff, W.H. & Woods, H.A. (2005) The metabolic basis of whole-organism RNA and phos-  
511 phorus content. *Proc. Natl. Acad. Sci.* **102**, 11923–11927, doi: [10.1073/pnas.0504756102](https://doi.org/10.1073/pnas.0504756102).
- 512 González, A.L., Fariña, J.M., Kay, A.D., Pinto, R. & Marquet, P.A. (2011) Exploring patterns and  
513 mechanisms of interspecific and intraspecific variation in body elemental composition of desert  
514 consumers. *Oikos* **120**, 1247–1255, doi: [10.1111/j.1600-0706.2010.19151.x](https://doi.org/10.1111/j.1600-0706.2010.19151.x).
- 515 Goos, J.M., Cothran, R.D. & Jeyasingh, P.D. (2017) Within-population variation in the chemistry  
516 of life: the stoichiometry of sexual dimorphism in multiple dimensions. *Evol. Ecol.* **31**, 1–17, doi:  
517 [10.1007/s10682-017-9900-9](https://doi.org/10.1007/s10682-017-9900-9).
- 518 Hewison, A.J.M., Angibault, J.M., Boutin, J., Bideau, E., Vincent, J.P. & Sempéré, A.J. (1996) An-  
519 nual variation in body composition of roe deer (*Capreolus capreolus*) in moderate environmental  
520 conditions. *Can. J. Zool.* **74**, 245–253, doi: [10.1139/z96-031](https://doi.org/10.1139/z96-031).
- 521 Hood, W.R., Oftedal, O.T. & Kunz, T.H. (2006) Variation in body composition of female big brown  
522 bats (*Eptesicus fuscus*) during lactation. *J. Comp. Physiol. B Biochem. Syst. Environ. Physiol.*  
523 **176**, 807–819, doi: [10.1007/s00360-006-0102-y](https://doi.org/10.1007/s00360-006-0102-y).

- 524 Iason, G.R. (1988) Age determination of mountain hares (*Lepus timidus*): a rapid method and  
525 when to use it. *J. Appl. Ecol.* **25**, 389–395, doi: [10.2307/2403831](https://doi.org/10.2307/2403831).
- 526 Jeyasingh, P.D., Cothran, R.D. & Tobler, M. (2014) Testing the ecological consequences of evolu-  
527 tionary change using elements. *Ecol. Evol.* **4**, 528–538, doi: [10.1002/ece3.950](https://doi.org/10.1002/ece3.950).
- 528 Krebs, C.J., Boonstra, R. & Boutin, S. (2018) Using experimentation to understand the 10-year  
529 snowshoe hare cycle in the boreal forest of North America. *J. Anim. Ecol.* **87**, 87–100, doi:  
530 [10.1111/1365-2656.12720](https://doi.org/10.1111/1365-2656.12720).
- 531 Leal, M., Seehausen, O. & Matthews, B. (2017) The ecology and evolution of stoichiometric phe-  
532 notypes. *Trends Ecol. Evol.* **32**, 108–117, doi: [10.1016/j.tree.2016.11.006](https://doi.org/10.1016/j.tree.2016.11.006).
- 533 Leroux, S.J. (2019) On the prevalence of uninformative parameters in statistical models applying  
534 model selection in applied ecology. *PLoS One* **14**, 1–12, doi: [10.1371/journal.pone.0206711](https://doi.org/10.1371/journal.pone.0206711).
- 535 Leroux, S.J. & Schmitz, O.J. (2015) Predator-driven elemental cycling: the impact of predation  
536 and risk effects on ecosystem stoichiometry. *Ecol. Evol.* **5**, 4976–4988, doi: [10.1002/ece3.1760](https://doi.org/10.1002/ece3.1760).
- 537 Leroux, S.J., Wal, E.V., Wiersma, Y.F., Charron, L., Ebel, J.D., Ellis, N.M., Hart, C., Kissler,  
538 E., Saunders, P.W., Moudrá, L., Tanner, A.L. & Yalcin, S. (2017) Stoichiometric distribu-  
539 tion models: ecological stoichiometry at the landscape extent. *Ecol. Lett.* **20**, 1495–1506, doi:  
540 [10.1111/ele.12859](https://doi.org/10.1111/ele.12859).
- 541 Litvaitis, J.A., Sherburne, J.A. & Bissonette, J.A. (1985) Influence of Understory Characteristics on  
542 Snowshoe Hare Habitat Use and Density. *J. Wildl. Manage.* **49**, 866–873, doi: [10.2307/3801359](https://doi.org/10.2307/3801359).
- 543 Main, T.M., Dobberfuhl, D.R. & Elser, J.J. (1997) N:P stoichiometry and ontogeny of crus-  
544 tacean zooplankton: a test of the growth rate hypothesis. *Limnol. Oceanogr.* **42**, 1474–1478,  
545 doi: [10.4319/lo.1997.42.6.1474](https://doi.org/10.4319/lo.1997.42.6.1474).
- 546 Martiny, A.C., Pham, C.T.A., Primeau, F.W., Vrugt, J.A., Moore, J.K., Levin, S.A. & Lomas,  
547 M.W. (2013) Strong latitudinal patterns in the elemental ratios of marine plankton and organic  
548 matter. *Nat. Geosci.* **6**, 279–283, doi: [10.1038/ngeo1757](https://doi.org/10.1038/ngeo1757).

- 549 Mazerolle, M.J. (2017) *AICcmodavg: Model selection and multimodel inference based on (Q)AIC(c)*.  
550 <https://cran.r-project.org/package=AICcmodavg>.
- 551 Morris, P. (1972) A review of mammalian age determination methods. *Mamm. Rev.* **2**, 69–104, doi:  
552 [10.1111/j.1365-2907.2012.00221.x](https://doi.org/10.1111/j.1365-2907.2012.00221.x).
- 553 Murray, D.L. (2002) Differential body condition and vulnerability to predation in snowshoe hares.  
554 *J. Anim. Ecol.* **71**, 614–625, doi: [10.1046/j.1365-2656.2002.00632.x](https://doi.org/10.1046/j.1365-2656.2002.00632.x).
- 555 Pastor, J.P., Cohen, Y. & Hobbs, N.T. (2006) The roles of large herbivores in ecosystem  
556 nutrient cycles. *Large Herbiv. Ecol. Ecosyst. Dyn. Conserv.* (eds. K. Danell, P. Duncan,  
557 R. Bergström & J. Pastor), Conservation Biology, pp. 289–325, Cambridge University Press,  
558 doi: [10.1017/CBO9780511617461.012](https://doi.org/10.1017/CBO9780511617461.012).
- 559 Peig, J. & Green, A.J. (2009) New perspectives for estimating body condition from mass/length  
560 data: The scaled mass index as an alternative method. *Oikos* **118**, 1883–1891, doi:  
561 [10.1111/j.1600-0706.2009.17643.x](https://doi.org/10.1111/j.1600-0706.2009.17643.x).
- 562 Peig, J. & Green, A.J. (2010) The paradigm of body condition: A critical reappraisal of cur-  
563 rent methods based on mass and length. *Funct. Ecol.* **24**, 1323–1332, doi: [10.1111/j.1365-](https://doi.org/10.1111/j.1365-2435.2010.01751.x)  
564 [2435.2010.01751.x](https://doi.org/10.1111/j.1365-2435.2010.01751.x).
- 565 Poitevin, E. (2012) Determination of calcium, copper, iron, magnesium, manganese, potassium,  
566 phosphorus, sodium, and zinc in fortified food products by microwave digestion and inductively  
567 coupled plasma-optical emission spectrometry: Single-laboratory validation and ring trial. *Jour-*  
568 *nal of AOAC International* **95**, 177–185, doi: [10.5740/jaoacint.CS2011\\_14](https://doi.org/10.5740/jaoacint.CS2011_14).
- 569 R Core Team (2018) *R: A Language and Environment for Statistical Computing*. R Foundation for  
570 Statistical Computing, Vienna, Austria, <https://www.R-project.org/>.
- 571 Reynolds, J.J., Vander Wal, E., Adams, B.K., Curran, R.M. & Doucet, C.M. (2017) Does prey  
572 density predict characteristics of primiparity in a solitary and specialized predator, the Canada  
573 lynx (*Lynx canadensis*)? *Can. J. Zool.* **95**, 779–785, doi: [10.1139/cjz-2016-0269](https://doi.org/10.1139/cjz-2016-0269).

- 574 Rivas-Ubach, A., Sardans, J., Perez-Trujillo, M., Estiarte, M. & Penuelas, J. (2012) Strong rela-  
575 tionship between elemental stoichiometry and metabolome in plants. *Proc. Natl. Acad. Sci.* **109**,  
576 4181–4186, doi: [10.1073/pnas.1116092109](https://doi.org/10.1073/pnas.1116092109).
- 577 Sardans, J., Alonso, R., Janssens, I.A., Carnicer, J., Vereseoglou, S., Rillig, M.C., Fernández-  
578 Martínez, M., Sanders, T.G.M. & Peñuelas, J. (2016) Foliar and soil concentrations and sto-  
579 ichiometry of nitrogen and phosphorous across European *Pinus sylvestris* forests: Relation-  
580 ships with climate, N deposition and tree growth. *Funct. Ecol.* **30**, 676–689, doi: [10.1111/1365-2435.12541](https://doi.org/10.1111/1365-2435.12541).
- 582 Schmitz, O.J., Raymond, P.A., Estes, J.A., Kurz, W.A., Holtgrieve, G.W., Ritchie, M.E., Schindler,  
583 D.E., Spivak, A.C., Wilson, R.W., Bradford, M.A., Christensen, V., Deegan, L., Smetacek, V.,  
584 Vanni, M.J. & Wilmers, C.C. (2014) Animating the carbon cycle. *Ecosystems* **17**, 344–359, doi:  
585 [10.1007/s10021-013-9715-7](https://doi.org/10.1007/s10021-013-9715-7).
- 586 Schmitz, O.J., Wilmers, C.C., Leroux, S.J., Doughty, C.E., Atwood, T.B., Galetti, M., Davies,  
587 A.B. & Goetz, S.J. (2018) Animals and the zoogeochemistry of the carbon cycle. *Science* **362**,  
588 eaar3213, doi: [10.1126/science.aar3213](https://doi.org/10.1126/science.aar3213).
- 589 Shaw, C.N., Wilson, P.J. & White, B.N. (2003) A Reliable Molecular Method of  
590 Gender Determination for Mammals. *J. Mammal.* **84**, 123–128, doi: [10.1644/1545-1542\(2003\)084%3C0123:ARMMOG%3E2.0.CO;2](https://doi.org/10.1644/1545-1542(2003)084%3C0123:ARMMOG%3E2.0.CO;2).
- 592 Sterner, R.W. & Elser, J.J. (2002) *Ecological stoichiometry: the biology of elements from molecules*  
593 *to the biosphere*. Princeton University Press.
- 594 Stevenson, R.D. & Woods, W.A. (2006) Condition indices for conservation: New uses for evolving  
595 tools. *Integr. Comp. Biol.* **46**, 1169–1190, doi: [10.1093/icb/icl052](https://doi.org/10.1093/icb/icl052).
- 596 Strong, J.S. & Leroux, S.J. (2014) Impact of Non-Native Terrestrial Mammals on the Structure  
597 of the Terrestrial Mammal Food Web of Newfoundland, Canada. *PLoS One* **9**, e106264, doi:  
598 [10.1371/journal.pone.0106264](https://doi.org/10.1371/journal.pone.0106264).
